# Supplementary material for: Structural design of polyurethane/poly(butylene succinate)/polycaprolactone compounds via a multilayer-assembled strategy: achieving tunable triple-shape memory performances
Source: Royal Society of Chemistry journal article supplement (doi:10.1039/c8ra08119k), 2018-01-01
Supplement: c8ra08119k1.pdf [file c8ra08119k1.pdf]

# Structural design of polyurethane/poly (butylene succinate)/polycaprolactone compounds via multilayer-assembled strategy: achieving tunable triple-shape memory performances

Yu Zheng, Xiaoying Ji, Qingwen Wang, Jiabin Shen \*, Shaoyun Guo \*

Polymer Research Institute of Sichuan University, State Key Laboratory of Polymer  
Materials Engineering, Chengdu, Sichuan 610065, P. R. China

\* Corresponding author. Email: shenjb@scu.edu.cn (Jiabin Shen)

nic7702@scu.edu.cn (Shaoyun Guo)

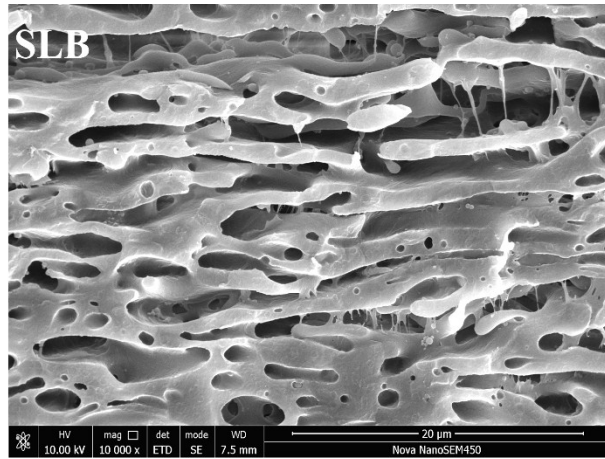

**Fig. S1** SEM picture of SLB after selectively etching PCL.

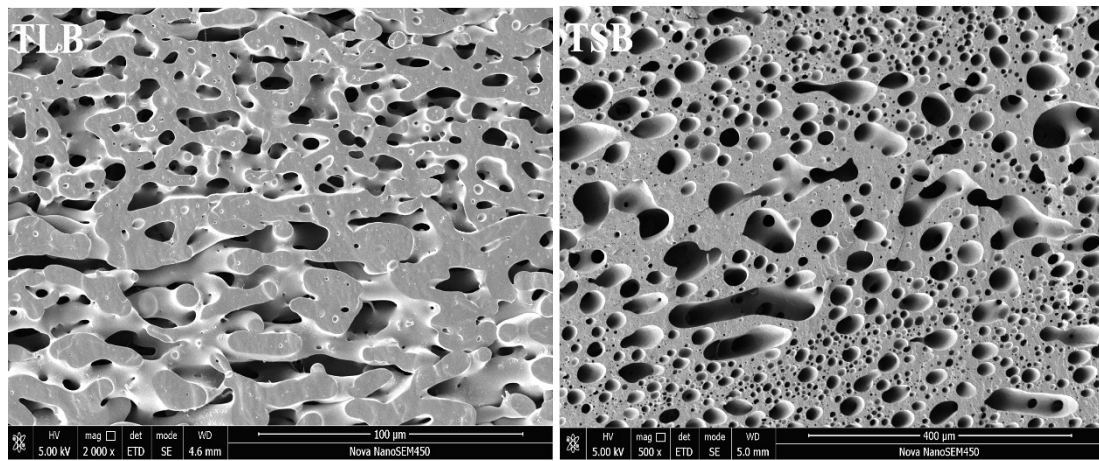

**Fig. S2** SEM pictures of TLB and TSB after selectively etching PCL and PBS, respectively.

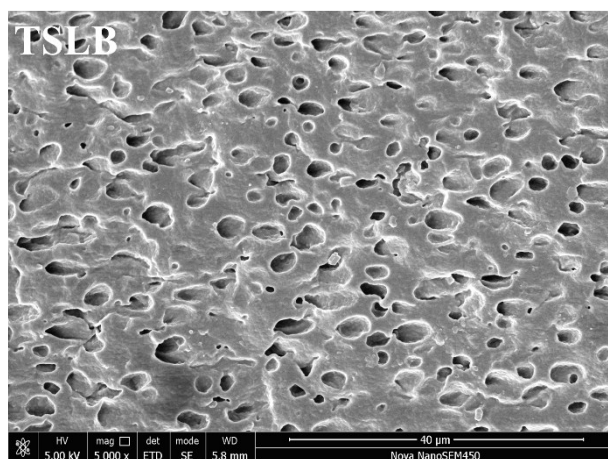

**Fig. S3** SEM picture of TSLB after selectively etching PCL and PBS.

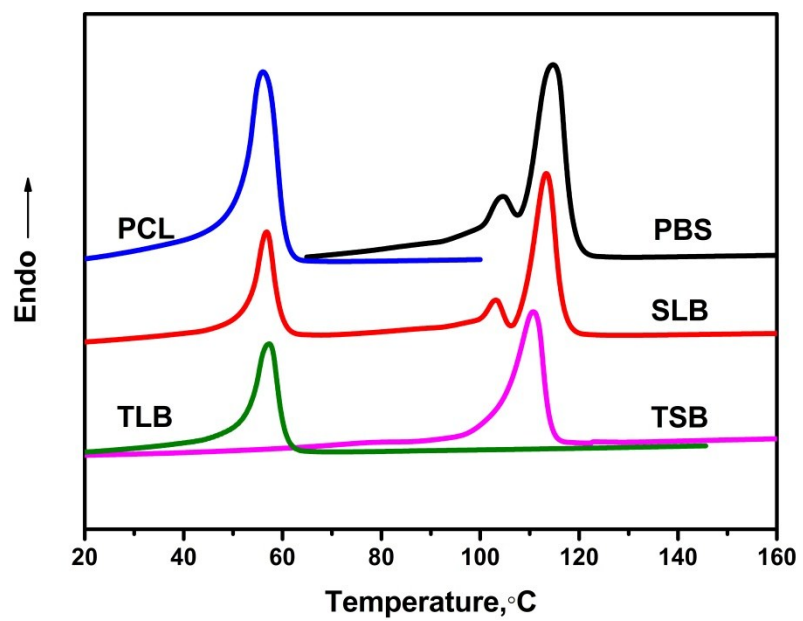

**Fig. S4** DSC heating curves of PBS, PCL, SLB, TLB and TSB.

**Table S1** The degrees of crystallizations of PCL and PBS in the blending and multilayer specimens calculated from the DSC curves.

| <b>Sample</b> | <b>TSLB</b> | <b>TSB/TLB</b> | <b>TPU/SLB</b> |
|---------------|-------------|----------------|----------------|
| $X_{c,PCL}$   | 29.1%       | 27.0%          | 28.2%          |
| $X_{c,PBS}$   | 54.1%       | 53.6%          | 55.4%          |

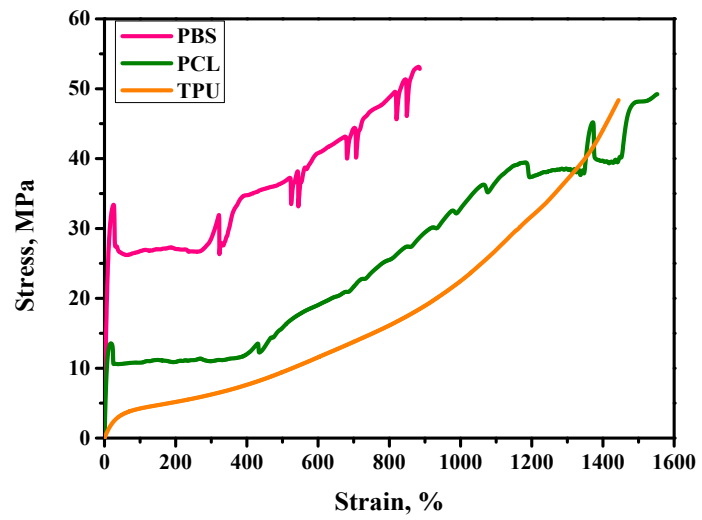

**Fig. S5** Stress-strain curves of PBS, PCL and TPU.
